# Supplementary material for: Macrophage metabolism in the intestine is compartment specific and regulated by the microbiota
Source: PubMed Central journal article supplement (PMC10357482; doi:10.1111/imm.13461), 2022-03-11

SUPP FIGURE 2: Effect of amino acid and short chain fatty acid supplementation on intestinal macrophage metabolism

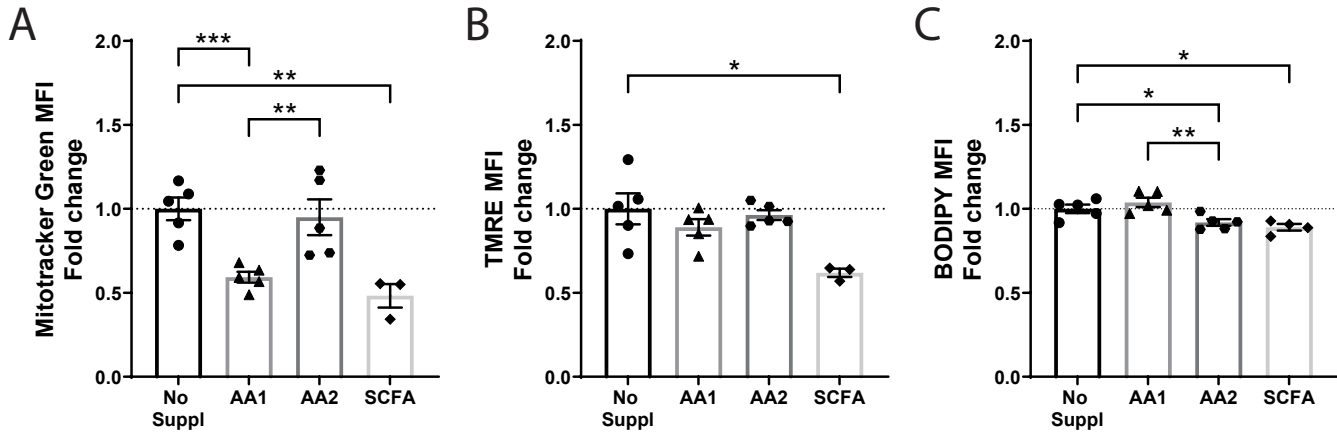

Supplement: IMM-166-138-s002.pdf [file IMM-166-138-s002.pdf]
